# Supplementary material for: Inflammatory Cytokines and ctDNA Are Biomarkers for Progression in Advanced-Stage Melanoma Patients Receiving Checkpoint Inhibitors
Source: PubMed Central journal article supplement (PMC7353055; doi:10.3390/cancers12061414), 2020-05-30
Supplement: cancers-12-01414-s001.pdf [file cancers-12-01414-s001.pdf]

# Supplementary Materials: Inflammatory Cytokines and ctDNA Are Biomarkers for Progression in Advanced-Stage Melanoma Patients Receiving Checkpoint Inhibitors

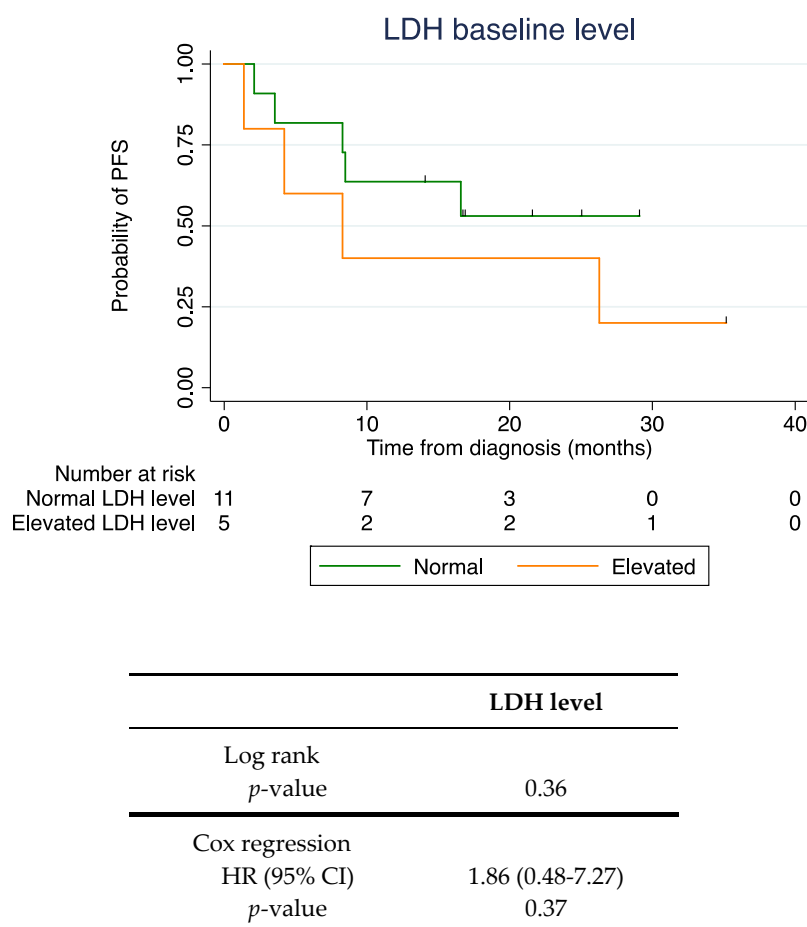

**Figure S1.** Survival analysis according to LDH level. Kaplan-Meier plot of progression-free survival (PFS) according to LDH level in the baseline blood sample ( $n = 16$ ). Based on the LDH level, patients were divided into two groups; normal LDH level and elevated LDH level. HR; hazard ratio.

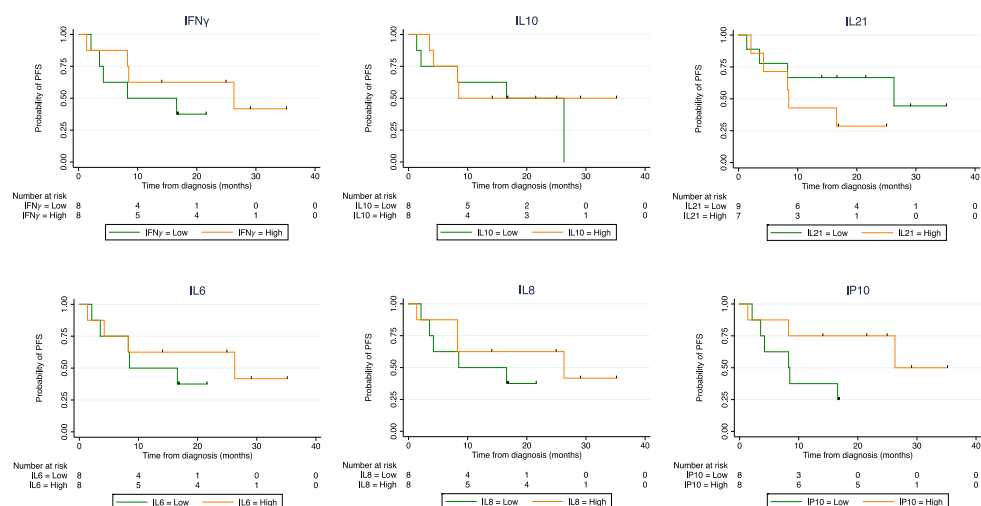

**Figure S2.** Survival analysis of baseline cytokine levels in patients treated with checkpoint inhibitors. Baseline plasma samples from 16 patients treated with checkpoint inhibitors were analysed for the concentration of interferon  $\gamma$  (IFN $\gamma$ ), Interleukin (IL) 10, IL21, IL6, IL8, and interferon  $\gamma$ -induced protein 10 (IP10). For each IFN $\gamma$ , IL10, IL6, IL8, and IP10, the patients were dichotomized by the individual median cytokine concentration into a low and a high cytokine group. For IL21, patients were dichotomized according to undetectable (low) versus detectable (high) levels of IL21. Kaplan-Meier curves for progression-free survival (PFS) is shown for each of the six analysed cytokines. Tick marks denote censored patients.

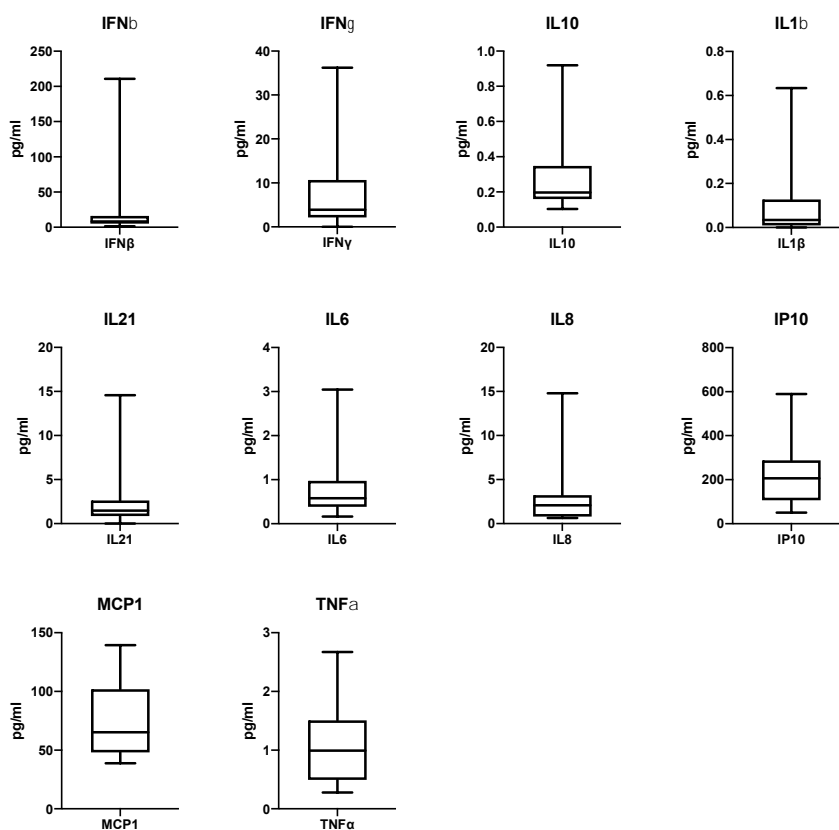

**Figure S3.** Interpatient cytokine variation. Box plots showing the concentration (pg/ml) of each cytokine. Each box represent the interquartile ranges, the central line indicates median, and the whiskers indicate the minimum and maximum values.

**Table S1.** ddPCR assay information.

| Locus          | Gene | Mutation   |            | COSMIC ID   | Bio-Rad assay ID | Amplicon size (bp) | Annealing temperature (°C) | Validated <sup>1</sup> | LoD (%) |
|----------------|------|------------|------------|-------------|------------------|--------------------|----------------------------|------------------------|---------|
|                |      | CDS        | Amino acid |             |                  |                    |                            |                        |         |
| Chr7:140453136 | BRAF | c.1799T>A  | p.V600E    | COSM476     | dHsaMDV2010027   | 91                 | 55                         | Yes                    | 0,1     |
| Chr1:115256529 | NRAS | c.182A>G   | Q61R       | COSM584     | dHsaMDV2010071   | 65                 | 55                         | Yes                    | 0,2     |
| Chr1:115256530 | NRAS | c.181C>A   | Q61K       | COSM580     | dHsaMDV2010067   | 65                 | 55                         | Yes                    | 0,2     |
| Chr5:1295113   | TERT | c.1-124C>T | N/A        | COSM1716558 | N/A <sup>2</sup> | 116                | 62                         | N/A                    | 0,3     |

Abbreviations: CDS, coding DNA sequence; del, deletion; \*, translation termination; fs, frameshift; bp, base pairs; LoD, limit of detection; N/A, Not applicable; 1: Validated indicates if the assay has been wet-lab validated by Bio-Rad; 2: Designed and validated in-house; fwd primer: 5'-cct tea cct tcc agc tcc g-3'; Rev primer: 5'- gcc gcg gaa agg aag gg-3'; wild-type probe 5'-/HEX/cag ccc cct /ZEN/ccg ggc cct/IBFQ/-3'; Mutant probe: 5'-/FAM/cag ccc ctt/ZEN/ccg ggc cct/IBFQ/-3'; IBFQ: Iowa Black® FQ

**Table S2.** Lower limit of quantification for Meso Scale Discovery analysis.

| Assay        | Lower Limit of Quantification (pg/mL) |         |         |
|--------------|---------------------------------------|---------|---------|
|              | Plate 1                               | Plate 2 | Plate 3 |
| IFN $\beta$  | 3,09                                  | 2,48    | 5,15    |
| IFN $\gamma$ | 2,2                                   | 3,11    | 4,74    |
| IL10         | 0,0658                                | 0,0802  | 0,185   |
| IL1 $\beta$  | 0,0757                                | 0,0767  | 0,227   |
| IL21         | 3,92                                  | 0,914   | 3,06    |
| IL6          | 0,209                                 | 0,115   | 0,272   |
| IL8          | 0,089                                 | 0,095   | 0,378   |
| IP10         | 0,43                                  | 0,702   | 1,03    |
| MCP1         | 0,46                                  | 0,406   | 1,16    |
| TNF $\alpha$ | 0,496                                 | 0,462   | 0,829   |

**Table S3.** Contingency tables comparing ctDNA vs cytokine score, LDH vs ctDNA, and LDH vs cytokine score.

|                                  |              | Cytokine score |            |
|----------------------------------|--------------|----------------|------------|
|                                  |              | High           | Low        |
| ctDNA                            | Undetectable | 5              | 3          |
|                                  | Detectable   | 0              | 4          |
| Fishers exact test: $p = 0.0808$ |              |                |            |
|                                  |              | ctDNA          |            |
|                                  |              | Undetectable   | Detectable |
| LDH                              | Normal       | 6              | 2          |
|                                  | Elevated     | 2              | 2          |
| Fishers exact test: $p = 0.55$   |              |                |            |
|                                  |              | Cytokine score |            |
|                                  |              | High           | Low        |
| LDH                              | Normal       | 3              | 5          |
|                                  | Elevated     | 2              | 2          |
| Fishers exact test: $p = 0.9999$ |              |                |            |
